# Supplementary material
Source: Elsevier journal article supplement (https://www.sciencedirect.com/science/article/pii/S0213911115000722)
Supplement: mmc1 [file S0213911115000722:mmc1.docx]

**Apéndice. Material suplementario**

**Tabla I**

Tabla de vida abreviada. España, hombres, 2010-2012

| Edad (años) | Población | Defunciones | nmx | nqx | npx | lx | ndx | nLx | Tx | ex |
| --- | --- | --- | --- | --- | --- | --- | --- | --- | --- | --- |
| <1 | 730970 | 2421 | 0,00332 | 0,00331 | 0,99669 | 100000 | 331 | 99686 | 7915748 | 79,16 |
| 1- 4 | 3094094 | 539 | 0,00017 | 0,00070 | 0,99930 | 99669 | 69 | 398512 | 7816062 | 78,42 |
| 5- 9 | 3622590 | 370 | 0,00010 | 0,00051 | 0,99949 | 99599 | 51 | 497870 | 7417551 | 74,47 |
| 10-14 | 3333931 | 401 | 0,00012 | 0,00060 | 0,99940 | 99549 | 60 | 497593 | 6919681 | 69,51 |
| 15-19 | 3376060 | 947 | 0,00028 | 0,00140 | 0,99860 | 99489 | 139 | 497095 | 6422088 | 64,55 |
| 20-24 | 3812350 | 1685 | 0,00044 | 0,00221 | 0,99779 | 99349 | 219 | 496198 | 5924993 | 59,64 |
| 25-29 | 4742399 | 2222 | 0,00047 | 0,00234 | 0,99766 | 99130 | 232 | 495070 | 5428795 | 54,76 |
| 30-34 | 5939530 | 3577 | 0,00060 | 0,00301 | 0,99699 | 98898 | 297 | 493746 | 4933726 | 49,89 |
| 35-39 | 6143234 | 5361 | 0,00087 | 0,00435 | 0,99565 | 98601 | 429 | 491930 | 4439979 | 45,03 |
| 40-44 | 5720807 | 8885 | 0,00155 | 0,00774 | 0,99226 | 98171 | 759 | 488958 | 3948049 | 40,22 |
| 45-49 | 5266467 | 14424 | 0,00274 | 0,01360 | 0,98640 | 97412 | 1325 | 483747 | 3459091 | 35,51 |
| 50-54 | 4642841 | 21216 | 0,00457 | 0,02259 | 0,97741 | 96087 | 2171 | 475009 | 2975344 | 30,97 |
| 55-59 | 3919723 | 27469 | 0,00701 | 0,03444 | 0,96556 | 93916 | 3234 | 461497 | 2500335 | 26,62 |
| 60-64 | 3527981 | 37316 | 0,01058 | 0,05152 | 0,94848 | 90682 | 4672 | 441731 | 2038839 | 22,48 |
| 65-69 | 3027868 | 47313 | 0,01563 | 0,07519 | 0,92481 | 86010 | 6467 | 413882 | 1597108 | 18,57 |
| 70-74 | 2391774 | 59017 | 0,02467 | 0,11621 | 0,88379 | 79543 | 9243 | 374605 | 1183226 | 14,88 |
| 75-79 | 2182722 | 93028 | 0,04262 | 0,19258 | 0,80742 | 70299 | 13538 | 317651 | 808620 | 11,50 |
| 80-84 | 1504683 | 112440 | 0,07473 | 0,31482 | 0,68518 | 56761 | 17870 | 239131 | 490969 | 8,65 |
| 85 y más | 1070149 | 165264 | 0,15443 | 1,00000 | 0,00000 | 38892 | 38892 | 251838 | 251838 | 6,48 |
|  | | |  |  |  |  |  |  |  |  |

ex: esperanza de vida a la edad x; lx: supervivientes a la edad x; ndx: defunciones entre las edades x y x+n; nLx: años vividos entre las edades x y x+n; nmx: tasa de mortalidad entre las edades x y x+n; npx: probabilidad de supervivencia entre las edades x y x+n; nqx: probabilidad de muerte entre las edades x y x+n; Tx: años vividos desde la edad x.

**Tabla II**

Tabla de vida abreviada. España, hombres, 2000-2002

| Edad (años) | Población | Defunciones | nmx | nqx | npx | lx | ndx | nLx | Tx | ex |
| --- | --- | --- | --- | --- | --- | --- | --- | --- | --- | --- |
| <1 | 625429 | 2872 | 0,00461 | 0,00459 | 0,99541 | 100000 | 459 | 99566 | 7606572 | 76,07 |
| 1- 4 | 2322988 | 661 | 0,00028 | 0,00114 | 0,99886 | 99541 | 113 | 397896 | 7507006 | 75,42 |
| 5- 9 | 2966513 | 493 | 0,00017 | 0,00083 | 0,99917 | 99428 | 83 | 496931 | 7109110 | 71,50 |
| 10-14 | 3278447 | 622 | 0,00019 | 0,00095 | 0,99905 | 99345 | 94 | 496489 | 6612179 | 66,56 |
| 15-19 | 3880538 | 2326 | 0,00060 | 0,00299 | 0,99701 | 99251 | 297 | 495511 | 6115689 | 61,62 |
| 20-24 | 4905089 | 4314 | 0,00088 | 0,00439 | 0,99561 | 98954 | 434 | 493683 | 5620178 | 56,80 |
| 25-29 | 5323309 | 5063 | 0,00095 | 0,00474 | 0,99526 | 98520 | 467 | 491429 | 5126494 | 52,04 |
| 30-34 | 5145098 | 6481 | 0,00126 | 0,00628 | 0,99372 | 98052 | 616 | 488722 | 4635065 | 47,27 |
| 35-39 | 4932468 | 8691 | 0,00176 | 0,00877 | 0,99123 | 97437 | 855 | 485046 | 4146343 | 42,55 |
| 40-44 | 4474634 | 10947 | 0,00245 | 0,01216 | 0,98784 | 96582 | 1174 | 479974 | 3661297 | 37,91 |
| 45-49 | 3889497 | 14077 | 0,00362 | 0,01793 | 0,98207 | 95408 | 1711 | 472761 | 3181322 | 33,34 |
| 50-54 | 3615273 | 20032 | 0,00554 | 0,02733 | 0,97267 | 93697 | 2560 | 462082 | 2708562 | 28,91 |
| 55-59 | 3216774 | 26744 | 0,00831 | 0,04072 | 0,95928 | 91136 | 3711 | 446403 | 2246479 | 24,65 |
| 60-64 | 2707309 | 34976 | 0,01292 | 0,06257 | 0,93743 | 87425 | 5471 | 423448 | 1800076 | 20,59 |
| 65-69 | 2894100 | 58208 | 0,02011 | 0,09575 | 0,90425 | 81954 | 7847 | 390154 | 1376628 | 16,80 |
| 70-74 | 2456907 | 79062 | 0,03218 | 0,14892 | 0,85108 | 74107 | 11036 | 342947 | 986474 | 13,31 |
| 75-79 | 1764901 | 95613 | 0,05417 | 0,23856 | 0,76144 | 63071 | 15047 | 277741 | 643527 | 10,20 |
| 80-84 | 962472 | 85294 | 0,08862 | 0,36273 | 0,63727 | 48025 | 17420 | 196574 | 365786 | 7,62 |
| 85 y más | 641222 | 115975 | 0,18087 | 1,00000 | 0,00000 | 30605 | 30605 | 169212 | 169212 | 5,53 |
|  | | |  |  |  |  |  |  |  |  |

ex: esperanza de vida a la edad x; lx: supervivientes a la edad x; ndx: defunciones entre las edades x y x+n; nLx: años vividos entre las edades x y x+n; nmx: tasa de mortalidad entre las edades x y x+n; npx: probabilidad de supervivencia entre las edades x y x+n; nqx: probabilidad de muerte entre las edades x y x+n; Tx: años vividos desde la edad x.

**Tabla III**

Tabla de vida abreviada. España, mujeres, 2010-2012

| Edad (años) | Población | Defunciones | nmx | nqx | npx | lx | ndx | nLx | Tx | ex |
| --- | --- | --- | --- | --- | --- | --- | --- | --- | --- | --- |
| <1 | 688539 | 2041 | 0,00297 | 0,00296 | 0,99704 | 100000 | 296 | 99721 | 8522981 | 85,23 |
| 1- 4 | 2912608 | 455 | 0,00016 | 0,00062 | 0,99938 | 99704 | 62 | 398660 | 8423260 | 84,48 |
| 5- 9 | 3421558 | 261 | 0,00008 | 0,00038 | 0,99962 | 99641 | 38 | 498111 | 8024600 | 80,53 |
| 10-14 | 3155497 | 276 | 0,00009 | 0,00044 | 0,99956 | 99603 | 44 | 497908 | 7526489 | 75,56 |
| 15-19 | 3203848 | 487 | 0,00015 | 0,00076 | 0,99924 | 99560 | 76 | 497610 | 7028581 | 70,60 |
| 20-24 | 3688694 | 608 | 0,00016 | 0,00082 | 0,99918 | 99484 | 82 | 497216 | 6530972 | 65,65 |
| 25-29 | 4623539 | 940 | 0,00020 | 0,00102 | 0,99898 | 99402 | 101 | 496758 | 6033756 | 60,70 |
| 30-34 | 5655443 | 1622 | 0,00029 | 0,00143 | 0,99857 | 99301 | 142 | 496150 | 5536998 | 55,76 |
| 35-39 | 5815511 | 2687 | 0,00046 | 0,00231 | 0,99769 | 99159 | 229 | 495222 | 5040848 | 50,84 |
| 40-44 | 5534701 | 4469 | 0,00081 | 0,00403 | 0,99597 | 98930 | 399 | 493654 | 4545625 | 45,95 |
| 45-49 | 5249875 | 7037 | 0,00134 | 0,00668 | 0,99332 | 98531 | 658 | 491012 | 4051972 | 41,12 |
| 50-54 | 4751204 | 9799 | 0,00206 | 0,01026 | 0,98974 | 97873 | 1004 | 486856 | 3560960 | 36,38 |
| 55-59 | 4107131 | 11931 | 0,00290 | 0,01442 | 0,98558 | 96869 | 1397 | 480854 | 3074104 | 31,73 |
| 60-64 | 3808966 | 15439 | 0,00405 | 0,02006 | 0,97994 | 95472 | 1915 | 472573 | 2593250 | 27,16 |
| 65-69 | 3383918 | 20754 | 0,00613 | 0,03020 | 0,96980 | 93557 | 2826 | 460720 | 2120677 | 22,67 |
| 70-74 | 2869239 | 30743 | 0,01071 | 0,05218 | 0,94782 | 90731 | 4734 | 441821 | 1659957 | 18,30 |
| 75-79 | 2911848 | 63709 | 0,02188 | 0,10372 | 0,89628 | 85997 | 8920 | 407686 | 1218136 | 14,16 |
| 80-84 | 2336125 | 105616 | 0,04521 | 0,20309 | 0,79691 | 77077 | 15654 | 346252 | 810449 | 10,51 |
| 85 y más | 2192682 | 290139 | 0,13232 | 1,00000 | 0,00000 | 61423 | 61423 | 464198 | 464198 | 7,56 |
|  | | |  |  |  |  |  |  |  |  |

ex: esperanza de vida a la edad x; lx: supervivientes a la edad x; ndx: defunciones entre las edades x y x+n; nLx: años vividos entre las edades x y x+n; nmx: tasa de mortalidad entre las edades x y x+n; npx: probabilidad de supervivencia entre las edades x y x+n; nqx: probabilidad de muerte entre las edades x y x+n; Tx: años vividos desde la edad x.

**Tabla IV**

Tabla de vida abreviada. España, mujeres, 2000-2002

| Edad (años) | Población | Defunciones | nmx | nqx | npx | lx | ndx | nLx | Tx | ex |
| --- | --- | --- | --- | --- | --- | --- | --- | --- | --- | --- |
| <1 | 590904 | 2262 | 0,00384 | 0,00383 | 0,99617 | 100000 | 383 | 99641 | 8304211 | 83,04 |
| 1- 4 | 2199124 | 488 | 0,00022 | 0,00089 | 0,99911 | 99617 | 88 | 398249 | 8204570 | 82,36 |
| 5- 9 | 2809483 | 344 | 0,00012 | 0,00061 | 0,99939 | 99529 | 61 | 497492 | 7806320 | 78,43 |
| 10-14 | 3104127 | 409 | 0,00013 | 0,00066 | 0,99934 | 99468 | 66 | 497176 | 7308829 | 73,48 |
| 15-19 | 3688244 | 887 | 0,00024 | 0,00120 | 0,99880 | 99402 | 119 | 496713 | 6811653 | 68,53 |
| 20-24 | 4679831 | 1292 | 0,00028 | 0,00138 | 0,99862 | 99283 | 137 | 496072 | 6314939 | 63,61 |
| 25-29 | 5095071 | 1635 | 0,00032 | 0,00160 | 0,99840 | 99146 | 159 | 495333 | 5818867 | 58,69 |
| 30-34 | 4984035 | 2335 | 0,00047 | 0,00234 | 0,99766 | 98987 | 232 | 494356 | 5323535 | 53,78 |
| 35-39 | 4872512 | 3408 | 0,00070 | 0,00349 | 0,99651 | 98755 | 345 | 492915 | 4829178 | 48,90 |
| 40-44 | 4484824 | 4665 | 0,00104 | 0,00519 | 0,99481 | 98411 | 510 | 490777 | 4336263 | 44,06 |
| 45-49 | 3922129 | 6059 | 0,00154 | 0,00769 | 0,99231 | 97900 | 753 | 487618 | 3845486 | 39,28 |
| 50-54 | 3696834 | 8022 | 0,00217 | 0,01079 | 0,98921 | 97147 | 1048 | 483114 | 3357868 | 34,56 |
| 55-59 | 3359771 | 10412 | 0,00310 | 0,01538 | 0,98462 | 96099 | 1478 | 476799 | 2874755 | 29,91 |
| 60-64 | 2945284 | 14301 | 0,00486 | 0,02399 | 0,97601 | 94621 | 2270 | 467431 | 2397956 | 25,34 |
| 65-69 | 3313201 | 27090 | 0,00818 | 0,04006 | 0,95994 | 92351 | 3700 | 452507 | 1930525 | 20,90 |
| 70-74 | 3042550 | 44660 | 0,01468 | 0,07079 | 0,92921 | 88651 | 6276 | 427567 | 1478018 | 16,67 |
| 75-79 | 2482465 | 71082 | 0,02863 | 0,13360 | 0,86640 | 82375 | 11006 | 384363 | 1050451 | 12,75 |
| 80-84 | 1668653 | 96128 | 0,05761 | 0,25178 | 0,74822 | 71370 | 17969 | 311925 | 666089 | 9,33 |
| 85 y más | 1467118 | 221210 | 0,15078 | 1,00000 | 0,00000 | 53400 | 53400 | 354164 | 354164 | 6,63 |
|  | | |  |  |  |  |  |  |  |  |

ex: esperanza de vida a la edad x; lx: supervivientes a la edad x; ndx: defunciones entre las edades x y x+n; nLx: años vividos entre las edades x y x+n; nmx: tasa de mortalidad entre las edades x y x+n; npx: probabilidad de supervivencia entre las edades x y x+n; nqx: probabilidad de muerte entre las edades x y x+n; Tx: años vividos desde la edad x.

**Tabla V**

Tabla de vida abreviada. México, hombres, 2010-2012

| Edad (años) | Población | Defunciones | nmx | nqx | npx | lx | ndx | nLx | Tx | ex |
| --- | --- | --- | --- | --- | --- | --- | --- | --- | --- | --- |
| <1 | 3406378 | 48877 | 0,01454 | 0,01435 | 0,98565 | 100000 | 1435 | 98685 | 7286870 | 72,87 |
| 1- 4 | 13712765 | 9135 | 0,00067 | 0,00266 | 0,99734 | 98565 | 262 | 393634 | 7188185 | 72,93 |
| 5- 9 | 17276027 | 4826 | 0,00028 | 0,00140 | 0,99860 | 98303 | 137 | 491172 | 6794551 | 69,12 |
| 10-14 | 17306494 | 6256 | 0,00036 | 0,00181 | 0,99819 | 98166 | 177 | 490385 | 6303380 | 64,21 |
| 15-19 | 16637508 | 21522 | 0,00129 | 0,00645 | 0,99355 | 97988 | 632 | 488363 | 5812994 | 59,32 |
| 20-24 | 15007575 | 31325 | 0,00209 | 0,01038 | 0,98962 | 97357 | 1011 | 484257 | 5324631 | 54,69 |
| 25-29 | 13532925 | 33183 | 0,00245 | 0,01219 | 0,98781 | 96346 | 1174 | 478795 | 4840375 | 50,24 |
| 30-34 | 12723724 | 35710 | 0,00281 | 0,01394 | 0,98606 | 95172 | 1326 | 472544 | 4361580 | 45,83 |
| 35-39 | 11908175 | 40054 | 0,00336 | 0,01668 | 0,98332 | 93846 | 1565 | 465316 | 3889036 | 41,44 |
| 40-44 | 10685903 | 41937 | 0,00392 | 0,01943 | 0,98057 | 92281 | 1793 | 456920 | 3423721 | 37,10 |
| 45-49 | 9042676 | 48160 | 0,00533 | 0,02628 | 0,97372 | 90487 | 2378 | 446492 | 2966801 | 32,79 |
| 50-54 | 7504039 | 56680 | 0,00755 | 0,03707 | 0,96293 | 88109 | 3266 | 432382 | 2520309 | 28,60 |
| 55-59 | 6051130 | 64722 | 0,01070 | 0,05209 | 0,94791 | 84844 | 4419 | 413170 | 2087927 | 24,61 |
| 60-64 | 4647329 | 72275 | 0,01555 | 0,07485 | 0,92515 | 80424 | 6020 | 387072 | 1674757 | 20,82 |
| 65-69 | 3527982 | 79826 | 0,02263 | 0,10708 | 0,89292 | 74405 | 7967 | 352106 | 1287685 | 17,31 |
| 70-74 | 2608077 | 89417 | 0,03428 | 0,15789 | 0,84211 | 66438 | 10490 | 305964 | 935579 | 14,08 |
| 75-79 | 1837673 | 95495 | 0,05197 | 0,22995 | 0,77005 | 55948 | 12865 | 247576 | 629615 | 11,25 |
| 80-84 | 1147495 | 89953 | 0,07839 | 0,32773 | 0,67227 | 43083 | 14119 | 180114 | 382040 | 8,87 |
| 85 y más | 932110 | 133698 | 0,14344 | 1,00000 | 0,00000 | 28963 | 28963 | 201925 | 201925 | 6,97 |
|  | | |  |  |  |  |  |  |  |  |

ex: esperanza de vida a la edad x; lx: supervivientes a la edad x; ndx: defunciones entre las edades x y x+n; nLx: años vividos entre las edades x y x+n; nmx: tasa de mortalidad entre las edades x y x+n; npx: probabilidad de supervivencia entre las edades x y x+n; nqx: probabilidad de muerte entre las edades x y x+n; Tx: años vividos desde la edad x.

**Tabla VI**

Tabla de vida abreviada. México, hombres, 2000-2002

| Edad (años) | Población | Defunciones | nmx | nqx | npx | lx | ndx | nLx | Tx | ex |
| --- | --- | --- | --- | --- | --- | --- | --- | --- | --- | --- |
| <1 | 3518764 | 63199 | 0,01826 | 0,01796 | 0,98204 | 100000 | 1796 | 98373 | 7350665 | 73,51 |
| 1- 4 | 14097011 | 11162 | 0,00079 | 0,00316 | 0,99684 | 98204 | 310 | 392070 | 7252292 | 73,85 |
| 5- 9 | 17424575 | 5936 | 0,00034 | 0,00170 | 0,99830 | 97893 | 167 | 489051 | 6860222 | 70,08 |
| 10-14 | 16480722 | 6867 | 0,00042 | 0,00208 | 0,99792 | 97727 | 203 | 488126 | 6371171 | 65,19 |
| 15-19 | 15334047 | 15590 | 0,00102 | 0,00507 | 0,99493 | 97524 | 495 | 486381 | 5883045 | 60,32 |
| 20-24 | 14242863 | 21872 | 0,00154 | 0,00765 | 0,99235 | 97029 | 742 | 483290 | 5396664 | 55,62 |
| 25-29 | 12976905 | 24751 | 0,00191 | 0,00949 | 0,99051 | 96287 | 914 | 479149 | 4913374 | 51,03 |
| 30-34 | 11479973 | 26184 | 0,00228 | 0,01134 | 0,98866 | 95373 | 1081 | 474161 | 4434225 | 46,49 |
| 35-39 | 9727063 | 28923 | 0,00297 | 0,01476 | 0,98524 | 94291 | 1392 | 467978 | 3960064 | 42,00 |
| 40-44 | 8152316 | 31757 | 0,00390 | 0,01929 | 0,98071 | 92900 | 1792 | 460020 | 3492085 | 37,59 |
| 45-49 | 6690274 | 35426 | 0,00530 | 0,02613 | 0,97387 | 91108 | 2381 | 449588 | 3032066 | 33,28 |
| 50-54 | 5303846 | 39720 | 0,00749 | 0,03676 | 0,96324 | 88727 | 3261 | 435483 | 2582478 | 29,11 |
| 55-59 | 4253848 | 45655 | 0,01073 | 0,05226 | 0,94774 | 85466 | 4467 | 416164 | 2146995 | 25,12 |
| 60-64 | 3426251 | 52964 | 0,01546 | 0,07442 | 0,92558 | 80999 | 6028 | 389928 | 1730831 | 21,37 |
| 65-69 | 2743476 | 60656 | 0,02211 | 0,10476 | 0,89524 | 74972 | 7854 | 355225 | 1340903 | 17,89 |
| 70-74 | 2043105 | 65391 | 0,03201 | 0,14817 | 0,85183 | 67118 | 9945 | 310728 | 985678 | 14,69 |
| 75-79 | 1363788 | 66986 | 0,04912 | 0,21873 | 0,78127 | 57173 | 12505 | 254601 | 674950 | 11,81 |
| 80-84 | 790781 | 55789 | 0,07055 | 0,29986 | 0,70014 | 44668 | 13394 | 189853 | 420349 | 9,41 |
| 85 y más | 641159 | 86992 | 0,13568 | 1,00000 | 0,00000 | 31274 | 31274 | 230496 | 230496 | 7,37 |
|  | | |  |  |  |  |  |  |  |  |

ex: esperanza de vida a la edad x; lx: supervivientes a la edad x; ndx: defunciones entre las edades x y x+n; nLx: años vividos entre las edades x y x+n; nmx: tasa de mortalidad entre las edades x y x+n; npx: probabilidad de supervivencia entre las edades x y x+n; nqx: probabilidad de muerte entre las edades x y x+n; Tx: años vividos desde la edad x.

**Tabla VII**

Tabla de vida abreviada. México, mujeres, 2010-2012

| Edad (años) | Población | Defunciones | nmx | nqx | npx | lx | ndx | nLx | Tx | ex |
| --- | --- | --- | --- | --- | --- | --- | --- | --- | --- | --- |
| <1 | 3251776 | 38152 | 0,01186 | 0,01173 | 0,98827 | 100000 | 1173 | 98927 | 7859892 | 78,60 |
| 1- 4 | 13105038 | 7629 | 0,00058 | 0,00233 | 0,99767 | 98827 | 230 | 394734 | 7760966 | 78,53 |
| 5- 9 | 16557318 | 3762 | 0,00023 | 0,00114 | 0,99886 | 98597 | 112 | 492705 | 7366232 | 74,71 |
| 10-14 | 16733659 | 4331 | 0,00026 | 0,00129 | 0,99871 | 98485 | 127 | 492107 | 6873527 | 69,79 |
| 15-19 | 16611448 | 8327 | 0,00050 | 0,00250 | 0,99750 | 98358 | 246 | 491173 | 6381420 | 64,88 |
| 20-24 | 15671144 | 9051 | 0,00058 | 0,00288 | 0,99712 | 98111 | 283 | 489850 | 5890248 | 60,04 |
| 25-29 | 14701734 | 9531 | 0,00065 | 0,00324 | 0,99676 | 97829 | 317 | 488351 | 5400398 | 55,20 |
| 30-34 | 14082436 | 11157 | 0,00079 | 0,00395 | 0,99605 | 97512 | 385 | 486596 | 4912047 | 50,37 |
| 35-39 | 13158081 | 14681 | 0,00112 | 0,00556 | 0,99444 | 97126 | 540 | 484281 | 4425451 | 45,56 |
| 40-44 | 11753799 | 18715 | 0,00159 | 0,00793 | 0,99207 | 96586 | 766 | 481016 | 3941170 | 40,80 |
| 45-49 | 9974135 | 26372 | 0,00264 | 0,01313 | 0,98687 | 95820 | 1258 | 475955 | 3460154 | 36,11 |
| 50-54 | 8303514 | 36065 | 0,00434 | 0,02148 | 0,97852 | 94562 | 2031 | 467730 | 2984199 | 31,56 |
| 55-59 | 6669076 | 45585 | 0,00684 | 0,03360 | 0,96640 | 92530 | 3109 | 454878 | 2516469 | 27,20 |
| 60-64 | 5137734 | 55356 | 0,01077 | 0,05246 | 0,94754 | 89421 | 4691 | 435378 | 2061591 | 23,05 |
| 65-69 | 3960710 | 64670 | 0,01633 | 0,07844 | 0,92156 | 84730 | 6646 | 407035 | 1626213 | 19,19 |
| 70-74 | 2987633 | 76023 | 0,02545 | 0,11962 | 0,88038 | 78084 | 9340 | 367069 | 1219178 | 15,61 |
| 75-79 | 2158111 | 87334 | 0,04047 | 0,18375 | 0,81625 | 68744 | 12632 | 312140 | 852108 | 12,40 |
| 80-84 | 1407507 | 93019 | 0,06609 | 0,28359 | 0,71641 | 56112 | 15913 | 240779 | 539969 | 9,62 |
| 85 y más | 1271337 | 170819 | 0,13436 | 1,00000 | 0,00000 | 40200 | 40200 | 299189 | 299189 | 7,44 |
|  | | |  |  |  |  |  |  |  |  |

ex: esperanza de vida a la edad x; lx: supervivientes a la edad x; ndx: defunciones entre las edades x y x+n; nLx: años vividos entre las edades x y x+n; nmx: tasa de mortalidad entre las edades x y x+n; npx: probabilidad de supervivencia entre las edades x y x+n; nqx: probabilidad de muerte entre las edades x y x+n; Tx: años vividos desde la edad x.

**Tabla VIII**

Tabla de vida abreviada. México, mujeres, 2000-2002

| Edad (años) | Población | Defunciones | nmx | nqx | npx | lx | ndx | nLx | Tx | ex |
| --- | --- | --- | --- | --- | --- | --- | --- | --- | --- | --- |
| <1 | 3399490 | 48117 | 0,01434 | 0,01415 | 0,98585 | 100000 | 1415 | 98715 | 7821723 | 78,22 |
| 1- 4 | 13643744 | 9332 | 0,00068 | 0,00273 | 0,99727 | 98585 | 269 | 393665 | 7723007 | 78,34 |
| 5- 9 | 17078817 | 4230 | 0,00025 | 0,00124 | 0,99876 | 98315 | 122 | 491272 | 7329342 | 74,55 |
| 10-14 | 16452713 | 4433 | 0,00027 | 0,00135 | 0,99865 | 98194 | 132 | 490638 | 6838069 | 69,64 |
| 15-19 | 15638673 | 7022 | 0,00045 | 0,00224 | 0,99776 | 98061 | 220 | 489757 | 6347432 | 64,73 |
| 20-24 | 14871256 | 7869 | 0,00053 | 0,00264 | 0,99736 | 97842 | 259 | 488561 | 5857674 | 59,87 |
| 25-29 | 13722991 | 8693 | 0,00063 | 0,00316 | 0,99684 | 97583 | 309 | 487144 | 5369113 | 55,02 |
| 30-34 | 12190498 | 10021 | 0,00082 | 0,00410 | 0,99590 | 97274 | 399 | 485375 | 4881969 | 50,19 |
| 35-39 | 10380217 | 12515 | 0,00121 | 0,00601 | 0,99399 | 96875 | 582 | 482922 | 4396595 | 45,38 |
| 40-44 | 8729444 | 15895 | 0,00182 | 0,00906 | 0,99094 | 96293 | 873 | 479284 | 3913673 | 40,64 |
| 45-49 | 7137768 | 20467 | 0,00287 | 0,01423 | 0,98577 | 95421 | 1358 | 473707 | 3434388 | 35,99 |
| 50-54 | 5664192 | 26406 | 0,00466 | 0,02304 | 0,97696 | 94062 | 2167 | 464893 | 2960681 | 31,48 |
| 55-59 | 4565812 | 32929 | 0,00721 | 0,03542 | 0,96458 | 91895 | 3255 | 451337 | 2495788 | 27,16 |
| 60-64 | 3690088 | 42282 | 0,01146 | 0,05570 | 0,94430 | 88640 | 4937 | 430857 | 2044451 | 23,06 |
| 65-69 | 2965024 | 50477 | 0,01702 | 0,08165 | 0,91835 | 83703 | 6834 | 401430 | 1613594 | 19,28 |
| 70-74 | 2246806 | 57747 | 0,02570 | 0,12075 | 0,87925 | 76869 | 9282 | 361140 | 1212164 | 15,77 |
| 75-79 | 1556598 | 60961 | 0,03916 | 0,17835 | 0,82165 | 67587 | 12054 | 307799 | 851024 | 12,59 |
| 80-84 | 947460 | 57963 | 0,06118 | 0,26531 | 0,73469 | 55533 | 14733 | 240830 | 543225 | 9,78 |
| 85 y más | 863692 | 116530 | 0,13492 | 1,00000 | 0,00000 | 40799 | 40799 | 302395 | 302395 | 7,41 |
|  | | |  |  |  |  |  |  |  |  |

ex: esperanza de vida a la edad x; lx: supervivientes a la edad x; ndx: defunciones entre las edades x y x+n; nLx: años vividos entre las edades x y x+n; nmx: tasa de mortalidad entre las edades x y x+n; npx: probabilidad de supervivencia entre las edades x y x+n; nqx: probabilidad de muerte entre las edades x y x+n; Tx: años vividos desde la edad x.
